# Supplementary material for: Membranous Expression of Heart Development Protein with EGF-like Domain 1 Is Associated with a Good Prognosis in Patients with Bladder Cancer
Source: MDPI journal article supplement (doi:10.3390/diagnostics13193067), 2023-09-27

## Supplementary Figure

### Supplementary Figure S1

Figure S1. Probability of survival in patients with urothelial carcinoma of the bladder according to cytoplasmic HEG1 expression estimated using the Kaplan–Meier method. (A) Cancer-specific survival, (B) Recurrence-free survival

(A)

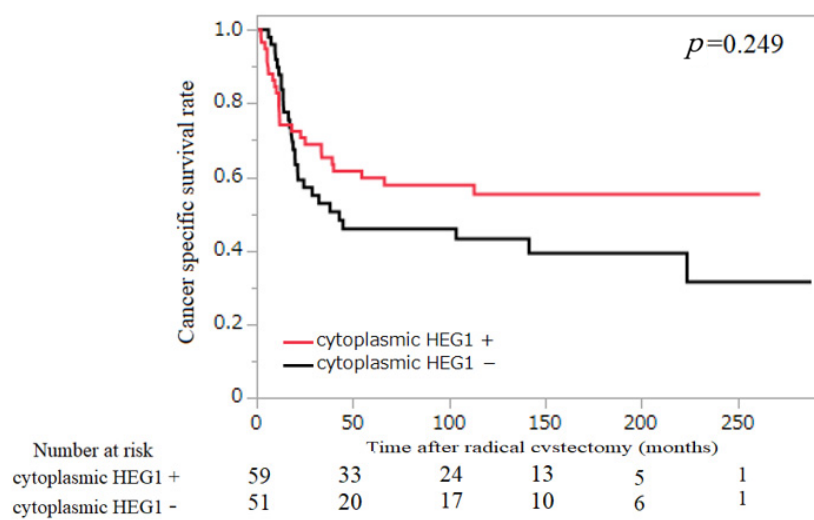

(B)

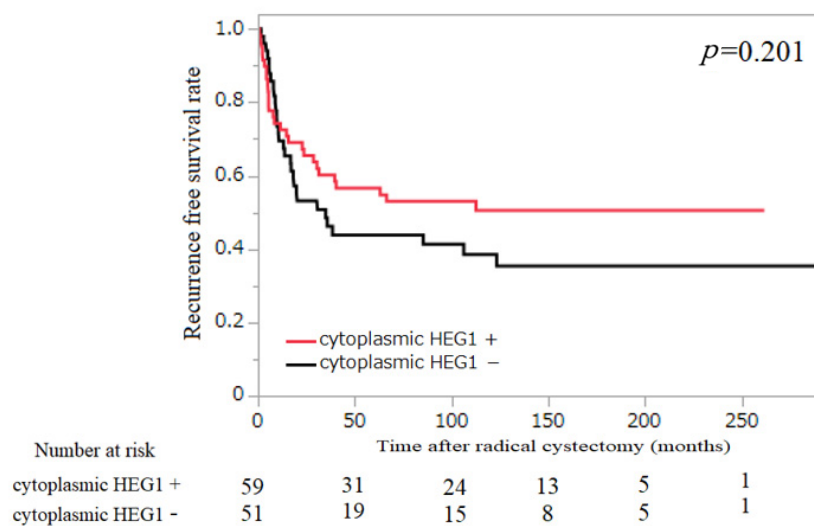

Supplement: s1 [file s1]
